1  
2  
3  
4  
5  
6  
7  
8  
9  
10  
11  
12  
13  
14  
15  
16  
17  
18  
19

**Mindfulness facets and psychological well-being among meditators: Serenity as a mediating process**

Rebecca Y. M. Cheung<sup>1\*</sup>, Iris Yili Wang<sup>2</sup> and Elsa Ngar-Sze Lau<sup>3</sup>

<sup>1</sup> School of Psychology and Clinical Language Sciences, University of Reading, Reading, United Kingdom

<sup>2</sup> Department of Special Education and Counselling, The Education University of Hong Kong, Hong Kong, China

<sup>3</sup> Department of Educational Administration and Policy, The Chinese University of Hong Kong, Hong Kong, China

\* Corresponding author

Email: [rebecca.cheung@reading.ac.uk](mailto:rebecca.cheung@reading.ac.uk)

## 20 **Abstract**

21           Guided by the theoretical processes of mindfulness and psychological well-being, this  
22 study examined serenity as a mediator between mindfulness facets and psychological well-being,  
23 as indexed by depressive symptoms and life satisfaction. Participants were 133 mindfulness  
24 practitioners who took part in a 3-day transnational meditation event in Hong Kong. Upon  
25 informed consent, participants completed a self-report questionnaire. The findings from  
26 structural equation modeling showed that serenity mediated the relation between two facets of  
27 mindfulness, including describing and nonreacting to inner experience, and life satisfaction.  
28 Serenity also mediated the relation between the mindfulness facet of describing and depressive  
29 symptoms. Direct associations were indicated between two mindfulness facets, including  
30 observing and nonjudging of inner experience, and depressive symptoms. Taken together, the  
31 findings revealed mindfulness facets as major correlates of serenity and psychological outcomes  
32 among Chinese meditation practitioners. To foster psychological well-being, researchers,  
33 educators, and practitioners should pay attention to role of serenity, describing, and nonreacting  
34 to inner experience in mental health.

## 35 **Introduction**

36           Mindfulness has been practiced for centuries in the context of Buddhism and  
37 contemplative Christianity [1, 2]. Nonetheless, research in this area has only flourished globally  
38 over the last two decades [3, 4]. According to Kabat-Zinn [5], mindfulness refers to paying  
39 attention nonjudgmentally to present-moment experiences such as emotions, thoughts, and body  
40 sensations. Numerous studies have shown that mindfulness has health benefits including better  
41 quality of life, better sleep quality, lower stress, fewer anxiety and depressive symptoms, and

42 greater life satisfaction [6, 7, 8, 9, 10, 11]. In addition, mindfulness also fosters greater  
43 spirituality. For instance, a meta-analytic study showed that after attending interventions such as  
44 mindfulness-based cognitive therapy (MBCT; [12]) and mindfulness-based cancer recovery  
45 (MBCR; [13]), participants from diverse clinical and nonclinical samples experienced greater  
46 spirituality [14]. As such, studies to date involving diverse international samples have shown that  
47 mindfulness is broadly linked to better spirituality, health, and well-being.

## 48 **Serenity as a Mediating Mechanism**

49 Spirituality overarches several dimensions, including serenity, which is defined as the  
50 spiritual state of inner peace, regardless of the experience of positive and negative life events  
51 [15, 16, 17]. More specifically, serenity is a three sub-dimensional construct including  
52 acceptance of self and uncontrollable events, ability to tap into the inner haven of peace, and  
53 trust in the meaningfulness and profoundness of life [15]. Previous research indicated that higher  
54 levels of mindfulness were linked to greater internal peace and harmony [18, 19]. After attending  
55 mindfulness-based programs, such as the MBSR [20], health care practitioners reported  
56 increased serenity [21, 22, 23]. Importantly, Shapiro et al. [24] theorized that mindfulness  
57 practice enables a shift of perspectives that fosters an accepting attitude toward negative  
58 emotions, an ability to enter the space of inner calmness, and a recognition of meaningful values,  
59 all of which point to greater serenity. Individuals who are more mindful are also more able to  
60 experience intense emotions with less reactivity and more objectivity. That is, mindfulness  
61 enables individuals to remain calm and non-reactive, despite an awareness of strong emotions  
62 [15, 17]. Previous research suggested that the stability of inner peace brought by spirituality was  
63 related to positive well-being outcomes, including fewer depressive symptoms and greater life  
64 satisfaction [25, 26, 27]. Other studies differentially indicated various aspects of serenity (e.g.,

65 acceptance of self and events beyond one's control, inner peace, and faith in the meaningfulness  
66 of life and larger plan) as mediators between mindfulness and well-being outcomes [18, 28, 29].  
67 As a unifying construct, serenity may serve as a mediator between mindfulness facets and well-  
68 being outcomes, including depressive symptoms and life satisfaction.

## 69 **Differential Contributions of the Facets of Mindfulness**

70 The Five Facets Mindfulness Questionnaires (FFMQ; [30]) is a commonly used measure  
71 of mindfulness, encompassing facets including observing, nonjudging of inner experience,  
72 describing, acting with awareness, and nonreacting to inner experience. According to Baer et al.  
73 [31], observing refers to attending to or noticing experiences internally and externally, namely  
74 sounds, emotions, and thoughts. Nonjudging of inner experience refers to adopting a  
75 nonevaluative position towards inner experiences, such as feelings and thoughts. Describing  
76 involves the labeling of inner experiences using words. Acting with awareness refers to attending  
77 to present-moment activities rather than being on autopilot. Finally, nonreacting to inner  
78 experience involves the inclination to let inner experiences (e.g., thoughts, feelings) come and  
79 go, instead of being taken away by them.

80 Although the longstanding literature has identified positive associations between  
81 mindfulness and well-being outcomes [8, 9, 10], emerging studies have highlighted differential  
82 contributions of each mindfulness facet on psychological well-being [32, 33, 34, 35]. For  
83 example, a study found that contradictory to other facets, observing was positively associated  
84 with psychological distress [32]. The authors speculated that the greater tendency to observe  
85 experiences may lead to anxiety or panic, particularly if the experiences are perceived as  
86 negative or dangerous. Another study yielding similar findings suggested that observing may be  
87 indicative of maladaptive self-attention, which may impede nonjudgmental moment-to-moment

88 awareness and give rise to greater distress [35]. Furthermore, a study involving a nonclinical  
89 sample indicated that after controlling for age, gender, and meditation practices, observing and  
90 describing did not predict psychological distress, whereas the other three facets of mindfulness,  
91 including nonjudging, nonreacting, and acting with awareness, were significant predictors of  
92 distress [32]. Baer [36] posited that for individuals without an experience of meditation,  
93 observation and attention to the present moment may be impulsive and judgmental. On the  
94 contrary, mindfulness practices may enable meditators to observe openly and acceptingly [36].  
95 Therefore, observing may be positively related to well-being outcomes among meditators.  
96 However, a study reported that observing was related to greater rumination and lower attentional  
97 control, and that the indirect links between observing and mental/physical health complaints via  
98 greater body awareness and nonattachment were significant among samples with or without  
99 meditation experience [37]. As such, the association between observing and well-being among  
100 meditators and non-meditators remain inconsistent and unclear. As for other mindfulness facets,  
101 Bergin and Pakenham [32] reported positive relations between all facets of mindfulness and life  
102 satisfaction, except for nonreacting. Given the inconsistency and scarcity of the findings  
103 especially among regular meditators, it is crucial to examine the unique contribution of each  
104 mindfulness facet in psychological well-being.

## 105 **The Present Study**

106 Guided by Shapiro et al.'s [24] theory on mindfulness, the present study investigated  
107 serenity as a mediator between mindfulness facets and well-being outcomes, including  
108 depressive symptoms and life satisfaction, among mindfulness practitioners. Of note, a majority  
109 of research in this area was conducted in general or clinical populations [26, 27, 29, 19].  
110 Relatively few studies have examined the role of mindfulness on mental health among

111 meditators, particularly in diverse Chinese contexts. Among the studies conducted in the Chinese  
112 context, findings did show that dispositional mindfulness was linked to depression and life  
113 satisfaction [6, 38, 10] and that an aspect of serenity (i.e., self-acceptance) did mediate the  
114 association between mindfulness and mental health among emerging adults between 17 and 25  
115 years of age in Hong Kong [25]. Nevertheless, more work is needed to understand the role of the  
116 unifying construct of serenity encompassing inner haven of peace, acceptance of self and  
117 uncontrollable events, and trust in the meaningfulness and profoundness of life. Based on theory  
118 and existing findings, the present study hypothesized that serenity would mediate the association  
119 between mindfulness facets and psychological well-being, including depressive symptoms and  
120 life satisfaction, among Chinese mindfulness practitioners.

## 121 **Materials and Method**

### 122 **Participants**

123 This study was part of a larger project aiming to investigate the psychological well-being  
124 among mindfulness practitioners (Masked for Peer Review). Mindfulness practitioners ( $N = 133$ ;  
125 75.94% female; 24.06% male) were recruited at a three-day transnational meditation event in  
126 Hong Kong in 7 to 9 June 2019. Ethics approval was sought by (Granting Body and Protocol  
127 Number Masked for Peer Review) prior to the commencement of this study. Written informed  
128 consent was collected from participants before they began the self-report questionnaire. Upon  
129 completion, the consent forms were collected and stored separately from the questionnaires in  
130 locked cabinets, such that participants' responses were not associated with any person-  
131 identifiable information.

132 All participants were ethnically Chinese who were between 20 and 72 years old ( $M =$   
133 47.95 years;  $SD = 11.55$  years). Regarding their education, .88% completed primary school,  
134 7.08% completed junior high school, 29.21% completed senior high school, 9.73% had a higher  
135 diploma, 28.32% had a bachelor's degree, 23.01% had a master's degree, and 1.77% had a  
136 doctoral degree. The median monthly household income was HK\$30001–\$40000 (~US\$3846.28  
137 – \$5141.39), which was greater than the median household income in Hong Kong [39].  
138 Regarding religion, 46.62% were Buddhists, 2.26% were non-Buddhist Chinese folk religion  
139 believers, 3.76% were Protestants, 2.26% were Catholics, 17.29% were Atheists, 8.27% were  
140 agnostic or did not have a particular religious belief, and 19.54% were “other”. Participants  
141 reportedly had an average of meditation practice for 2.98 years ( $SD = 4.13$  years). In addition,  
142 they reported practicing 2.42 hours of meditation each week ( $SD = 2.89$  hours).

## 143 **Measures**

### 144 *Mindfulness*

145 The 20-item Five Facet Mindfulness Questionnaire-Short Form (FFMQ-SF; [40]) was  
146 used to assess five facets of mindfulness, including observing, describing, nonjudging, acting  
147 with awareness, and nonreacting. Sample items included, “I pay attention to sensations, such as  
148 the wind in my hair or sun on my face” (observing), “I’m good at finding words to describe my  
149 feelings” (describing), “I tell myself I shouldn’t be feeling the way I’m feeling” (nonjudging),  
150 “When I do things, my mind wanders off and I’m easily distracted” (acting with awareness), and  
151 “In difficult situations, I can pause without immediately reacting” (nonreacting). Participants  
152 rated on a 5-point scale from 1 (*never or very rarely true*) to 5 (*very often or always true*).  
153 Negative items were reverse scored, such that higher average scores indicated greater

154 mindfulness. In this study, Cronbach's alpha = .83 for observing, .87 for describing, .65 for  
155 nonjudging, .89 for acting with awareness, and .88 for nonreacting.

### 156 ***Serenity***

157 The 22-item Brief Serenity Scale (BSS; [15]) was used to assess three factors of serenity,  
158 including trust, acceptance, and inner haven. Sample items included, "I trust that everything  
159 happens as it should" (trust), "In problem situations, I do what I am able to and then accept  
160 whatever happens even if I dislike it" (acceptance), and "I experience and inner calm even when  
161 I am under pressure" (inner haven). Participants rated on a 5-point scale from 1 (*never*) to 5  
162 (*always*). Item scores were averaged to create three subscale scores. Higher scores indicated  
163 greater serenity. In this study, Cronbach's alphas for the subscales = .91 for acceptance, .94 for  
164 inner haven, and .84 for trust.

### 165 ***Depressive Symptoms***

166 The 9-item Patient Health Questionnaire (PHQ-9; [41]) was used to assess depressive  
167 symptoms over the last 2 weeks on a 4-point scale from 0 (*not at all*) to 3 (*nearly every day*).  
168 Sample items included, "Feeling bad about yourself, or that you are a failure or have let yourself  
169 or your family down" and "Feeling down, depressed, or hopeless." Higher averaged scores  
170 indicated greater depressive symptoms. In this study, Cronbach's alpha = .93.

### 171 ***Life Satisfaction***

172 The 5-item Satisfaction with Life Scale (SWLS; [42]) was used to assess life satisfaction  
173 on a 7-point scale from 1 (*totally disagree*) to 7 (*totally agree*). Sample items included, "I am  
174 satisfied with my life" and "So far I have gotten the important things I want in life." Higher  
175 averaged scores indicated greater life satisfaction. In this study, Cronbach's alpha = .86.



## 176 **Data Analysis**

177 A structural equation model (SEM) was conducted using MPLUS, Version 8.3 [43] to  
178 investigate the mediating effect of serenity between mindfulness and psychological well-being,  
179 including life satisfaction and depressive symptoms, over and above covariates including age,  
180 gender, education, household income, experience of meditation, as well as hours of meditation  
181 each week. Maximum likelihood method was adopted to investigate the model fit to observed  
182 matrices of variance and covariance. Full information maximum likelihood estimation was used  
183 to handle missing data at the item or subscale level. Bootstrapping was used to investigate  
184 indirect mediation effects.

## 185 **Results**

186 Table 1 shows the correlations, means, and *SDs* of the variables. The structural model fit  
187 adequately to the data,  $\chi^2(279) = 384.79, p < .001$ , CFI = .94, TLI = .93, RMSEA = .06; SRMR  
188 = .06 (see Table 2 and Fig 1 for details). Latent variables including serenity, depressive  
189 symptoms, and life satisfaction were significantly indicated by their respective manifest  
190 indicators,  $ps < .001$ . After controlling for age, sex, income, years of education, meditation  
191 experience, and hours of meditation per week, two facets of mindfulness including describing  
192 and nonreacting were positively associated with serenity ( $B = .16, SE = .06, \beta = .18, p = .009$  and  
193  $B = .59, SE = .06, \beta = .71, p < .001$ , respectively). Serenity was, in turn, negatively related to  
194 depressive symptoms ( $B = -.40, SE = .19, \beta = -.40, p = .036$ ) and positively related to life  
195 satisfaction ( $B = 1.98, SE = .34, \beta = 1.03, p < .001$ ). In addition, two other facets of mindfulness  
196 were associated with depressive symptoms. Specifically, observing was positively related to

197 depressive symptoms ( $B = .21, SE = .07, \beta = .28, p = .004$ ), whereas nonjudging was negatively  
198 related to depressive symptoms ( $B = -.23, SE = .07, \beta = -.26, p = .001$ ).

199 Table 1. Zero-order Correlations, Means, and Standard Deviations of the Variable.

| Variable                                | 1     | 2       | 3    | 4    | 5      | 6      | 7      | 8      | 9     | 10      | 11      | 12      | 13      | 14     | 15      | 16   |
|-----------------------------------------|-------|---------|------|------|--------|--------|--------|--------|-------|---------|---------|---------|---------|--------|---------|------|
| 1. Sex (0 = male; 1 = female)           | –     |         |      |      |        |        |        |        |       |         |         |         |         |        |         |      |
| 2. Age                                  | -.05  | –       |      |      |        |        |        |        |       |         |         |         |         |        |         |      |
| 3. Education                            | -.00  | -.37*** | –    |      |        |        |        |        |       |         |         |         |         |        |         |      |
| 4. Income                               | .06   | -.02    | .20* | –    |        |        |        |        |       |         |         |         |         |        |         |      |
| 5. Experience of meditation (in months) | -.02  | .30**   | .06  | -.09 | –      |        |        |        |       |         |         |         |         |        |         |      |
| 6. Hours of meditation per week         | -.02  | .13     | -.09 | -.09 | .40*** | –      |        |        |       |         |         |         |         |        |         |      |
| 7. Mindfulness: Observing               | -.04  | .05     | .05  | -.10 | .15    | .23*   | –      |        |       |         |         |         |         |        |         |      |
| 8. Mindfulness: Describing              | -.11  | .20*    | .17  | .17  | .21*   | .09    | .58*** | –      |       |         |         |         |         |        |         |      |
| 9. Mindfulness: Acting with awareness   | -.12  | -.02    | -.05 | .14  | .07    | .10    | -.01   | -.10   | –     |         |         |         |         |        |         |      |
| 10. Mindfulness: Nonjudging             | -.03  | .11     | -.13 | -.01 | -.07   | .04    | -.15   | -.12   | .27** | –       |         |         |         |        |         |      |
| 11. Mindfulness: Nonreacting            | -.18  | .25**   | -.02 | .05  | .34*** | .34*** | .45*** | .62*** | .02   | .01     | –       |         |         |        |         |      |
| 12. Serenity: Acceptance                | -.17  | .21*    | .09  | .12  | .32*** | .31**  | .42*** | .63*** | .02   | -.01    | .83***  | –       |         |        |         |      |
| 13. Serenity: Inner haven               | -.13  | .22*    | .05  | .08  | .36*** | .35*** | .48*** | .65*** | -.02  | -.03    | .84***  | .90***  | –       |        |         |      |
| 14. Serenity: Trust                     | -.20* | .19*    | .15  | .14  | .27**  | .23*   | .40*** | .57*** | -.00  | -.05    | .70***  | .82***  | .75***  | –      |         |      |
| 15. Depressive symptoms                 | .08   | -.35*** | .03  | -.15 | -.18   | -.19   | .05    | -.21*  | -.18* | -.31*** | -.39*** | -.39*** | -.37*** | -.30** | –       |      |
| 16. Life satisfaction                   | .02   | .23*    | .12  | .22* | .21*   | .08    | .30**  | .51*** | .00   | -.06    | .62***  | .71***  | .72***  | .62*** | -.36*** | –    |
| <i>M</i>                                | –     | 49.95   | 5.72 | 4.59 | 35.79  | 2.42   | 3.44   | 3.22   | 3.22  | 3.00    | 3.21    | 3.46    | 3.38    | 3.49   | .60     | 4.78 |
| <i>SD</i>                               | –     | 11.55   | 2.17 | 2.86 | 49.60  | 2.59   | .91    | .81    | 1.05  | .78     | .84     | .72     | .83     | .82    | .66     | 1.30 |

200 Note. \* $p < .05$ , \*\* $p < .01$ , \*\*\* $p < .001$ .

201 **Table 2. Path Estimates of the Mediation Model.**

| Parameter                            | Unstandardized B (SE) | Standardized $\beta$ |
|--------------------------------------|-----------------------|----------------------|
| Measurement Model                    |                       |                      |
| Serenity                             |                       |                      |
| → Acceptance                         | 1.00 <sup>f</sup>     | .96***               |
| → Inner haven                        | 1.15 (.07)            | .95***               |
| → Trust                              | .98 (.07)             | .82***               |
| Depressive symptoms                  |                       |                      |
| → PHQ item 1                         | 1.00 <sup>f</sup>     | .81***               |
| → PHQ item 2                         | 1.04 (.09)            | .89***               |
| → PHQ item 3                         | .91 (.11)             | .68***               |
| → PHQ item 4                         | .84 (.11)             | .66***               |
| → PHQ item 5                         | .92 (.09)             | .79***               |
| → PHQ item 6                         | 1.22 (.11)            | .88***               |
| → PHQ item 7                         | .98 (.10)             | .79***               |
| → PHQ item 8                         | .88 (.10)             | .74***               |
| → PHQ item 9                         | .60 (.07)             | .71***               |
| Life satisfaction                    |                       |                      |
| → SWLS item 1                        | 1.00 <sup>f</sup>     | .85***               |
| → SWLS item 2                        | .82 (.09)             | .75***               |
| → SWLS item 3                        | 1.07 (.09)            | .90***               |
| → SWLS item 4                        | 1.04 (.10)            | .82***               |
| → SWLS item 5                        | .63 (.13)             | .46***               |
| Structural Model                     |                       |                      |
| Mindfulness: Observing               |                       |                      |
| → Serenity                           | .03 (.05)             | .04                  |
| → Depressive symptoms                | .21 (.07)             | .28**                |
| → Life satisfaction                  | -.06 (.11)            | -.04                 |
| Mindfulness: Describing              |                       |                      |
| → Serenity                           | .16 (.06)             | .18**                |
| → Depressive symptoms                | -.02 (.10)            | -.03                 |
| → Life satisfaction                  | -.08 (.16)            | -.05                 |
| Mindfulness: Acting with awareness   |                       |                      |
| → Serenity                           | .01 (.03)             | .01                  |
| → Depressive symptoms                | -.09 (.05)            | -.13                 |
| → Life satisfaction                  | .07 (.08)             | .06                  |
| Mindfulness: Nonjudging              |                       |                      |
| → Serenity                           | -.01 (.04)            | -.01                 |
| → Depressive symptoms                | -.23 (.07)            | -.26**               |
| → Life satisfaction                  | -.08 (.11)            | -.05                 |
| Mindfulness: Nonreacting             |                       |                      |
| → Serenity                           | .59 (.06)             | .71***               |
| → Depressive symptoms                | -.06 (.14)            | -.07                 |
| → Life satisfaction                  | -.19 (.23)            | -.12                 |
| Serenity                             |                       |                      |
| → Depressive symptoms                | -.40 (.19)            | -.40*                |
| → Life satisfaction                  | 1.98 (.34)            | 1.03***              |
| Covariance and Error Covariance      |                       |                      |
| Mindfulness: Observing               |                       |                      |
| ↔ Mindfulness: Describing            | .41 (.08)             | .57***               |
| ↔ Mindfulness: Acting with awareness | -.01 (.09)            | -.01                 |
| ↔ Mindfulness: Nonjudging            | -.11 (.07)            | -.15                 |
| ↔ Mindfulness: Nonreacting           | .33 (.07)             | .44***               |
| Mindfulness: Describing              |                       |                      |

|                                      |              |        |
|--------------------------------------|--------------|--------|
| ↔ Mindfulness: Acting with awareness | -08 (.08)    | -.10   |
| ↔ Mindfulness: Nonjudging            | -.07 (.06)   | -.11   |
| ↔ Mindfulness: Nonreacting           | .41 (.07)    | .62*** |
| Mindfulness: Acting with awareness   |              |        |
| ↔ Mindfulness: Nonjudging            | .22 (.08)    | .27**  |
| ↔ Mindfulness: Nonreacting           | .02 (.08)    | .02    |
| Mindfulness: Nonjudging              |              |        |
| ↔ Mindfulness: Nonreacting           | .01 (.06)    | .01    |
| Sex (0 = male; 1 = female)           |              |        |
| ↔ Mindfulness: Observing             | -.02 (.03)   | -.08   |
| ↔ Mindfulness: Describing            | -.04 (.02)   | -.15   |
| ↔ Mindfulness: Acting with awareness | -.02 (.03)   | -.07   |
| ↔ Mindfulness: Nonjudging            | .00 (.02)    | .01    |
| ↔ Mindfulness: Nonreacting           | -.06 (.02)   | -.21*  |
| → Serenity                           | -.01 (.11)   | -.01   |
| → Depressive symptoms                | -.06 (.17)   | -.03   |
| → Life satisfaction                  | .54 (.27)    | .13*   |
| Age                                  |              |        |
| ↔ Mindfulness: Observing             | .30 (1.03)   | .03    |
| ↔ Mindfulness: Describing            | 1.85 (.93)   | .20*   |
| ↔ Mindfulness: Acting with awareness | -.53 (1.20)  | -.04   |
| ↔ Mindfulness: Nonjudging            | .73 (.92)    | .08    |
| ↔ Mindfulness: Nonreacting           | 2.03 (.93)   | .21*   |
| → Serenity                           | .00 (.00)    | .02    |
| → Depressive symptoms                | -.02 (.01)   | -.26** |
| → Life satisfaction                  | .01 (.01)    | .12    |
| Education level                      |              |        |
| ↔ Mindfulness: Observing             | .19 (.27)    | .07    |
| ↔ Mindfulness: Describing            | .42 (.24)    | .17    |
| ↔ Mindfulness: Acting with awareness | -.14 (.31)   | -.04   |
| ↔ Mindfulness: Nonjudging            | -.31 (.24)   | -.13   |
| ↔ Mindfulness: Nonreacting           | .02 (.23)    | .01    |
| → Serenity                           | .02 (.01)    | .07    |
| → Depressive symptoms                | -.01 (.02)   | -.05   |
| → Life satisfaction                  | .01 (.03)    | .03    |
| Income                               |              |        |
| ↔ Mindfulness: Observing             | -.22 (.27)   | -.08   |
| ↔ Mindfulness: Describing            | .41 (.22)    | .18*   |
| ↔ Mindfulness: Acting with awareness | .45 (.30)    | .15    |
| ↔ Mindfulness: Nonjudging            | .02 (.22)    | .01    |
| ↔ Mindfulness: Nonreacting           | .17 (.23)    | .07    |
| → Serenity                           | -.01 (.01)   | .04    |
| → Depressive symptoms                | -.01 (.02)   | -.06   |
| → Life satisfaction                  | .03 (.03)    | .06    |
| Experience of meditation (in months) |              |        |
| ↔ Mindfulness: Observing             | 7.20 (4.35)  | .16    |
| ↔ Mindfulness: Describing            | 8.13 (3.77)  | .21*   |
| ↔ Mindfulness: Acting with awareness | 1.86 (5.08)  | .04    |
| ↔ Mindfulness: Nonjudging            | -3.70 (3.78) | -.10   |
| ↔ Mindfulness: Nonreacting           | 13.29 (4.02) | .33*** |
| → Serenity                           | .00 (.00)    | .04    |
| → Depressive symptoms                | .00 (.00)    | .00    |
| → Life satisfaction                  | -.00 (.00)   | .02    |
| Hours of meditation per week         |              |        |
| ↔ Mindfulness: Observing             | .64 (.27)    | .25*   |
| ↔ Mindfulness: Describing            | .23 (.22)    | .10    |

|                                         |            |        |
|-----------------------------------------|------------|--------|
| ↔ Mindfulness: Acting with awareness    | .25 (.30)  | .08    |
| ↔ Mindfulness: Nonjudging               | -.01 (.22) | -.00   |
| ↔ Mindfulness: Nonreacting              | .76 (.23)  | .32*** |
| → Serenity                              | .01 (.02)  | .06    |
| → Depressive symptoms                   | -.01 (.01) | -.06   |
| → Life satisfaction                     | -.08 (.02) | -.18*  |
| Depressive symptoms ↔ Life satisfaction | -.08 (.04) | -.23   |

202 Note. \* $p < .05$ , \*\* $p < .01$ , \*\*\* $p < .001$ .

203

204 **Fig 1. Final model of serenity as a mediator between mindfulness and depressive symptoms**  
205 **and life satisfaction.**

206

207 Based on the above findings, the indirect effects between two facets of mindfulness,  
208 including describing and nonreacting, and depressive symptoms and life satisfaction through  
209 serenity were investigated. Based on 5000 bootstrap samples with replacement, the 95%  
210 confidence interval (CI) indicated that the unstandardized indirect effect between describing and  
211 depressive symptoms did not include a zero (CI: [-.21, -.001]). However, the 95% CI indicated  
212 that the unstandardized indirect effect between nonreacting and depressive symptoms included a  
213 zero (CI: [-.56, .04]). As for life satisfaction, based on 5000 bootstrap samples with replacement,  
214 the 95% confidence interval (CI) indicated that the unstandardized indirect effect between  
215 describing and life satisfaction did not include a zero (CI: [.06, .36]). In addition, the 95% CI  
216 indicated that the unstandardized indirect effect between nonreacting and life satisfaction did not  
217 include a zero (CI: [.46, 1.11]). Hence, serenity mediated between describing and life  
218 satisfaction. Serenity also mediated between two facets of mindfulness, including describing and

219 nonreacting, and life satisfaction.

## 220 **Discussion**

221 Guided by Shapiro et al.'s [24] theory on mindfulness, this study examined serenity as a  
222 mediating process between mindfulness facets and psychological outcomes. The present findings  
223 provided incremental support to suggest serenity as a mediator between two facets of  
224 mindfulness [30], namely describing and nonreacting to inner experience, and life satisfaction.  
225 Serenity also mediated the relation between describing and depressive symptoms. In addition,  
226 direct associations were evidenced between mindfulness facets (i.e., observing and nonjudging of  
227 inner experience) and depressive symptoms. Altogether, the findings revealed mindfulness facets  
228 as major correlates of serenity and psychological outcomes among Chinese meditation  
229 practitioners.

230 In this study, serenity was associated with mindfulness facets (i.e., describing and  
231 nonreacting to inner experience) and psychological well-being. When people were capable of  
232 describing clearly and responding skillfully (vs. reacting mindlessly) to their experiences, they  
233 were also more likely to have greater serenity, e.g., accept themselves and uncontrollable events,  
234 touch the inner haven of peace, and trust that life is meaningful and profound [15]. Between the  
235 two mindfulness facets, the strength of association between nonreacting to inner experience and  
236 serenity was particularly strong, suggesting that the ability to pause, to “step back” without being  
237 taken over by inner experience, and to let go were especially crucial to shifting perspectives that  
238 foster serenity (see also [24]). Hence, to promote serenity, researchers, educators, and  
239 mindfulness practitioners should pay close attention to role of nonreacting to inner experience.

240 Somewhat surprisingly, other facets of mindfulness including observing, nonjudging of  
241 inner experience, and acting with awareness were unrelated to the spiritual state of serenity. Even

242 though the mindfulness facets were intercorrelated, their relations with serenity did not bear out  
243 after describing and nonreacting to inner experience were taken into account. Nonjudging of  
244 inner experience and observing were, instead, directly related to depressive symptoms, a core  
245 indicator of mental health. Consistent with previous research [44, 33, 45], when people were  
246 more judgmental and critical of their inner experience (e.g., “my thoughts are good, bad, or  
247 inappropriate”) and of how they should be (e.g., “I shouldn’t feel this way”), they were more  
248 likely to have greater depressive symptoms. Nevertheless, when people were more observing of  
249 their experiences internally and externally, they were also more likely to have greater depressive  
250 symptoms. The findings corroborated previous research [32, 35] to suggest that observing was  
251 positively related to depressive symptoms. As speculated by Tran et al. [35], perhaps observing  
252 was indicative of maladaptive self-attention that gave rise to depressive symptoms. Although  
253 Baer [36] argued that people without meditation experiences might observe the present  
254 judgmentally and impulsively, whereas practitioners might observe with openness and  
255 acceptance, in this study we found a positive link between observing and depressive symptoms  
256 among practitioners with a regular meditation practice (See [46] and [37] for similar findings). In  
257 addition, our SEM findings revealed that observing was not related to nonjudging of inner  
258 experience at all (see Fig 1). Given that observing was moderately related to describing ( $r = .57$ ,  
259  $p < .001$ ) and nonreacting to inner experience ( $r = .44$ ,  $p < .001$ ), the finding between observing  
260 and depressive symptoms could also be the result of multicollinearity. Hence, the study of  
261 observing and depression among people with and without meditation experience warrants future  
262 investigation.

263 Interestingly, acting with awareness was not related to serenity, depressive symptoms, or  
264 life satisfaction. That is, the ability to pay attention without being easily distracted, daydreaming,



265 or worrying was not related to serenity and psychological functioning, particularly when other  
266 mindfulness facets were taken into account. The null finding was intriguing, as it diverged from  
267 existing findings between mindful attention awareness [47], mind wandering, and psychological  
268 well-being [48, 49]. It also contradicted previous findings between mindful awareness and  
269 serenity based on samples from the Western contexts [15, 27]. To fully understand the link  
270 between acting with awareness and serenity, or the lack thereof, researchers should pay a closer  
271 attention to the use of assessments (e.g., FFMQ; [30] vs. Mindfulness Attention and Awareness  
272 Scale, MAAS; [47]), the role of culture (e.g., collectivistic vs. individualistic cultures), and  
273 sample characteristics (e.g., people with and without experiences of meditation, clinical samples,  
274 non-clinical samples).

275 Consistent with previous findings [15, 27], the core aspects of serenity were related to  
276 both depressive symptoms and life satisfaction. These findings suggested an important link  
277 between spiritual health and psychological well-being. In addition, serenity served as a potential  
278 mechanism between the mindfulness facets of describing and nonreacting to inner experience  
279 and psychological well-being. Supporting the literature, the findings inform researchers,  
280 educators, and mindfulness and mental health practitioners of the relevance of being mindful and  
281 serene in mental health.

## 282 **Limitations and Future Directions**

283 The present study has several limitations. First of all, the utilization of a self-report  
284 questionnaire could have resulted in method bias [50]. Thus, future studies should include  
285 multiple methods and multiple informants to reduce potential biases. Second, due to the cross-  
286 sectional design of the present study, we were unable to draw conclusions on the temporal  
287 sequence between the study variables. Future research should utilize a longitudinal design in

288 testing mediation [51]. Third, although nonreacting to inner experience and aspects of serenity  
289 are theoretically distinct variables, their zero-order correlations were large [52], ranging between  
290  $r_s = .70$  and  $.84$  (see Table 1). According to Baer et al. [31 p. 330], nonreacting to inner  
291 experience refers to “the tendency to allow thoughts and feelings to come and go, without getting  
292 caught up in or carried away by them.” As an overarching construct, serenity refers to the  
293 spiritual state of inner peace, regardless of the experience of positive and negative life events  
294 [15]. Although both constructs suggest nonreactivity to experiences, the mindfulness facet of  
295 nonreacting points primarily to inner experiences (e.g., thoughts, feelings), whereas serenity  
296 involves spiritual states regardless of internal vs. external experiences or stimuli. Serenity further  
297 involves an added layer of peace, trust, and acceptance beyond nonreactivity. Despite the  
298 potential differences, future research should distinguish or clarify theoretically and empirically  
299 the relation between non-reactivity and serenity. Finally, in this study, the recruitment of  
300 mindfulness practitioners took place in a meditation event and most of the study participants  
301 were women. Hence, future work is necessary to increase generalizability.

302         Despite the above limitations, the present study lends preliminary support to Shapiro et  
303 al.’s [24] theory on mindfulness and broadens the literature involving serenity as a process  
304 between mindfulness facets and psychological outcomes. As practical implications, educators  
305 and mental health practitioners should attend to the relations between various facets of  
306 mindfulness, serenity, and mental health. In terms of research implications, theoretical and  
307 empirical studies are necessary to clarify why, how, and when mindfulness facets are linked to  
308 serenity and mental health outcomes. Translational research gearing towards enhancing  
309 mindfulness and serenity also merits future investigations.

## 310 **References**

- 311 1. Kabat-Zinn J. Some reflections on the origins of MBSR, skillful means, and the trouble  
312 with maps. *Contemporary Buddhism*. 2011;12(1):281-306.  
313 doi:10.1080/14639947.2011.564844.
- 314 2. Trammel RC. Mindfulness as enhancing ethical decision-making and the Christian  
315 integration of mindful practice. *Soc Work Christ*. 2015;42(2):165-177.
- 316 3. Chi X, Bo A, Liu T, Zhang P, Chi I. Effects of mindfulness-based stress reduction on  
317 depression in adolescents and young adults: a systematic review and meta-analysis. *Front*  
318 *Psychol*. 2018;9:1034. doi:10.3389/fpsyg.2018.01034.
- 319 4. Garland EL, Farb NA, Goldin PR, Fredrickson BL. Mindfulness broadens awareness and  
320 builds eudaimonic meaning: A process model of mindful positive emotion regulation.  
321 *Psychol Inq*. 2015;26(4):293-314. doi:10.1080/1047840X.2015.1064294.
- 322 5. Kabat-Zinn J. *Wherever you go, there you are: Mindfulness meditation in everyday life*.  
323 Hyperion; 1994.
- 324 6. Cheung RYM, Ng MC. Mindfulness and symptoms of depression and anxiety: The  
325 underlying roles of awareness, acceptance, impulse control, and emotion regulation.  
326 *Mindfulness*. 2019;10(6):1124-1135. doi:10.1007/s12671-018-1069-y.
- 327 7. Garland EL, Hanley AW, Goldin PR, Gross JJ. Testing the mindfulness-to-meaning  
328 theory: Evidence for mindful positive emotion regulation from a reanalysis of  
329 longitudinal data. *PLoS One*. 2017;12(12):e0187727. doi:10.1371/journal.pone.0187727.
- 330 8. Grossman P, Niemann L, Schmidt S, Walach H. Mindfulness-based stress reduction and  
331 health benefits: A meta-analysis. *J Psychosom Res*. 2004;57(1):35-43.  
332 doi:10.1016/S0022-3999(03)00573-7.

- 333 9. Khoury B, Lecomte T, Fortin G, Masse M, Therien P, Bouchard V, et al. Mindfulness-  
334 based therapy: A comprehensive meta-analysis. *Clin Psychol Rev.* 2013;33(6):763-771.  
335 doi:10.1016/j.cpr.2013.05.005.
- 336 10. Kong F, Wang X, Zhao J. Dispositional mindfulness and life satisfaction: The role of  
337 core self-evaluations. *Pers Individ Dif.* 2014;56:165-169. doi:10.1016/j.paid.2013.09.002.
- 338 11. Valikhani A, Kashani V, Rahmanian M, Sattarian R, Rahmati Kankat L, Mills P.  
339 Examining the mediating role of perceived stress in the relationship between mindfulness  
340 and quality of life and mental health: testing the mindfulness stress buffering model.  
341 *Anxiety, Stress, & Coping.* 2020;33(3):311-325. doi:10.1080/10615806.2020.1723006.
- 342 12. Segal ZV, Williams JMG, Teasdale JD. Mindfulness-based cognitive therapy for  
343 depression: A new approach to preventing relapse. Guilford Press; 2002.
- 344 13. Carlson LE, Speca M. Mindfulness-based cancer recovery. New Harbinger; 2010.
- 345 14. Landau S, Jones F. Finding the spiritual in the secular: A meta-analysis of changes in  
346 spirituality following secular mindfulness-based programs. *Mindfulness.*  
347 2021;12(7):1567-1581. doi:10.1007/s12671-021-01600-0.
- 348 15. Kreitzer M, Gross C, Waleekhachonloet O, Reilly-Spong M, Byrd M. The brief serenity  
349 scale. *J Holist Nurs.* 2009;27(1):7-16. doi:10.1177/0898010108327212.
- 350 16. McEwan W. Spirituality in nursing. *Orthop Nurs.* 2004;23(5):321-326.  
351 doi:10.1097/00006416-200409000-00008.
- 352 17. Roberts K, Cunningham G. Serenity: Concept analysis and measurement. *Educ Gerontol.*  
353 1990;16(6):577-589. doi:10.1080/0380127900160607.
- 354 18. Ge J, Yang J, Song J, Jiang G, Zheng Y. Dispositional mindfulness and past-negative  
355 time perspective: The differential mediation effects of resilience and inner peace in

- 356 meditators and non-meditators. *Psychol Res Behav Manag.* 2020;13:397-405.  
357 doi:10.2147/PRBM.S229705.
- 358 19. Xu W, Rodriguez M, Zhang Q, Liu X. The mediating effect of self-acceptance in the  
359 relationship between mindfulness and peace of mind. *Mindfulness.* 2014;6(4):797-802.  
360 doi:10.1007/s12671-014-0319-x.
- 361 20. Kabat-Zinn J. Full catastrophe living: Using the wisdom of your body and mind to face,  
362 stress, pain and illness. Guilford Press; 2013.
- 363 21. Bazarko D, Cate R, Azocar F, Kreitzer M. The impact of an innovative mindfulness-  
364 based stress reduction program on the health and well-being of nurses employed in a  
365 corporate setting. *J Workplace Behav Health.* 2013;28(2):107-133.  
366 doi:10.1080/15555240.2013.779518.
- 367 22. Hilcove K, Marceau C, Thekdi P, Larkey L, Brewer MA, Jones K. Holistic nursing in  
368 practice: Mindfulness-based yoga as an intervention to manage stress and burnout. *J*  
369 *Holist Nurs.* 2021;39(1):29-42. doi:10.1177/0898010120921587.
- 370 23. Penque S. Mindfulness to promote nurses' well-being. *Nurs Manag.* 2019;50(5):38.  
371 doi:10.1097/01.NUMA.0000557621.42684.c4.
- 372 24. Shapiro S, Carlson L, Astin J, Freedman B. Mechanisms of mindfulness. *J Clin Psychol.*  
373 2006;62(3):373-386. doi:10.1002/jclp.20237.
- 374 25. Ma Y, Siu AFY. Dispositional mindfulness and mental health in Hong Kong college  
375 students: The mediating roles of decentering and self-acceptance. *Australian Journal of*  
376 *Psychology.* 2020;72(2):156-164. doi:10.1111/ajpy.12269.

- 377 26. Maier K, Surzykiewicz J. Mediated association between spirituality and life satisfaction  
378 in chronically ill undergraduate students. *Psychology of Religion and Spirituality*.  
379 2020;12(3):311-323. doi:10.1037/rel0000275.
- 380 27. Soysa C, Zhang F, Parmley M, Lahikainen K. Dispositional mindfulness and serenity:  
381 Their unique relations with stress and mental well-being. *J Happiness Stud*.  
382 2021;22(3):1517-1536. doi:10.1007/s10902-020-00282-0.
- 383 28. Klussman K, Nichols A, Langer J, Curtin N, Lindeman M. The relationship between  
384 mindfulness and subjective well-being: Examining the indirect effects of self-connection  
385 and meaning in life. *Appl Res Qual Life*. 2022;17:2423-2443. doi:10.1007/s11482-021-  
386 10025-9.
- 387 29. Whitehead R, Bates G, Elphinstone B, Yang Y, Murray G. Nonattachment mediates the  
388 relationship between mindfulness and psychological well-being, subjective well-being,  
389 and depression, anxiety and stress. *J Happiness Stud*. 2020;20(7):2141-2158.  
390 doi:10.1007/s10902-018-0041-9.
- 391 30. Baer R, Smith G, Hopkins J, Krietemeyer J, Toney L. Using self-report assessment  
392 methods to explore facets of mindfulness. *Assessment*. 2006;13(1):27-45.  
393 doi:10.1177/1073191105283504.
- 394 31. Baer R, Smith GT, Lykins E, Button D, Krietemeyer J, Sauer S, Walsh E, Duggan D,  
395 Williams JMG. Construct validity of the five facet mindfulness questionnaire in  
396 meditating and nonmeditating samples. *Assessment*. 2008;15(3):329-342.  
397 doi:10.1177/1073191107313003.

- 398 32. Bergin A, Pakenham K. The stress-buffering role of mindfulness in the relationship  
399 between perceived stress and psychological adjustment. *Mindfulness*. 2016;7(4):928-939.  
400 doi:10.1007/s12671-016-0532-x.
- 401 33. Medvedev O, Norden P, Krägeloh C, Siegert R. Investigating unique contributions of  
402 dispositional mindfulness facets to depression, anxiety, and stress in general and student  
403 populations. *Mindfulness*. 2018;9(6):1757-1767. doi:10.1007/s12671-018-0917-0.
- 404 34. Roemer A, Sutton A, Grimm C, Medvedev O. Differential contribution of the Five Facets  
405 of Mindfulness to well-being and psychological distress. *Mindfulness*. 2020;12(3):693-  
406 700. doi:10.1007/s12671-020-01535-y.
- 407 35. Tran U, Glück T, Nader I. Investigating the Five Facet Mindfulness Questionnaire  
408 (FFMQ): Construction of a short form and evidence of a two-factor higher order structure  
409 of mindfulness. *J Clin Psychol*. 2013;69(9):951-965. doi:10.1002/jclp.21996.
- 410 36. Baer R. Assessment of mindfulness and closely related constructs: Introduction to the  
411 special issue. *Psychol Assess*. 2016;28(7):787-790. doi:10.1037/pas0000309.
- 412 37. Karing C, Oeltjen L, Beelmann A. Relationships between mindfulness facets and mental  
413 and physical health in meditating and non-meditating university students. *Eur J Health  
414 Psychol*. 2021;28(4):183–192. doi:10.1027/2512-8442/a000085.
- 415 38. Cheung RYM, Ke Z, Ng MCY. Dispositional mindfulness and mental health: A  
416 multilevel model with emotion regulation as a mediating mechanism. *PLoS ONE*.  
417 2020;15(11):e0239575. doi:10.1371/journal.pone.0239575.
- 418 39. Census and Statistics Department. Hong Kong annual digest of statistics–2019 edition  
419 [Internet]. Hong Kong (HK): Census and Statistics Department, Hong Kong Special

- 420 Administrative Region. 2019.  
421 <https://www.statistics.gov.hk/pub/B10100032019AN19B0100.pdf>.
- 422 40. Hou J, Wong SYS, Lo HHM, Mak WWS, Ma HSW. Validation of a Chinese version of  
423 the five facet mindfulness questionnaire in Hong Kong and development of a short form.  
424 Assessment. 2014;21(3):363–371. doi:10.1177/1073191113485121.
- 425 41. Kroenke K, Spitzer R. The PHQ-9: A new depression diagnostic and severity measure.  
426 Psychiatr Ann. 2002;32(9):509-515. doi:10.3928/0048-5713-20020901-06.
- 427 42. Diener ED, Emmons RA, Larsen RJ, Griffin S. The satisfaction with life scale. J Pers  
428 Assess. 1985;49(1):71-75. doi:10.1207/s15327752jpa4901\_13.
- 429 43. Muthén LK, Muthén BO. MPLUS: Statistical analysis with latent variables: User’s guide  
430 (Version 8). Muthén & Muthén; 1998-2017.
- 431 44. Cash M, Whittingham K. What facets of mindfulness contribute to psychological well-  
432 being and depressive, anxious, and stress-related symptomatology? Mindfulness.  
433 2010;1(3):177-182. doi:10.1007/s12671-010-0023-4.
- 434 45. Rohde K, Adolph D, Dietrich DE, Michalak J. Mindful attention regulation and non-  
435 judgmental orientation in depression: a multi-method approach. Biol Psychol.  
436 2014;101:36-43. doi:10.1016/j.biopsycho.2014.06.009.
- 437 46. Bednar K, Voracek M, Tran US. Common factors underlying the five facets of  
438 mindfulness and proposed mechanisms: A psychometric study among meditators and  
439 non-meditators. Mindfulness. 2020;11(12):2804-2817. doi:10.1007/s12671-020-01492-6.
- 440 47. Brown KW, Ryan RM. The benefits of being present: Mindfulness and its role in  
441 psychological well-being. J Pers Soc Psychol. 2003;84(4):822–848. doi:10.1037/0022-  
442 3514.84.4.822.



- 443 48. Deng YQ, Li S, Tang YY. The relationship between wandering mind, depression and  
444 mindfulness. *Mindfulness*. 2014;5(2):124-128. doi:10.1007/s12671-012-0157-7.
- 445 49. Nayda DM, Takarangi MKT. The cost of being absent: Is meta-awareness of mind-  
446 wandering related to depression symptom severity, rumination tendencies and trauma  
447 intrusions? *J Affect Disord*. 2021;292:131-138. doi:10.1016/j.jad.2021.05.053.
- 448 50. Podsakoff PM, MacKenzie SB, Podsakoff NP. Sources of method bias in social science  
449 research and recommendations on how to control it. *Annu Rev Psychol*. 2012;63(1):539-  
450 569. doi:10.1146/annurev-psych-120710-100452.
- 451 51. Maxwell SE, Cole DA. Bias in cross-sectional analyses of longitudinal mediation.  
452 *Psychol Methods*. 2007;12(1):23-44. doi:10.1037/1082-989x.12.1.23.
- 453 52. Cohen J. *Statistical power analysis for the behavioral sciences*. 2nd ed. Erlbaum; 1988.

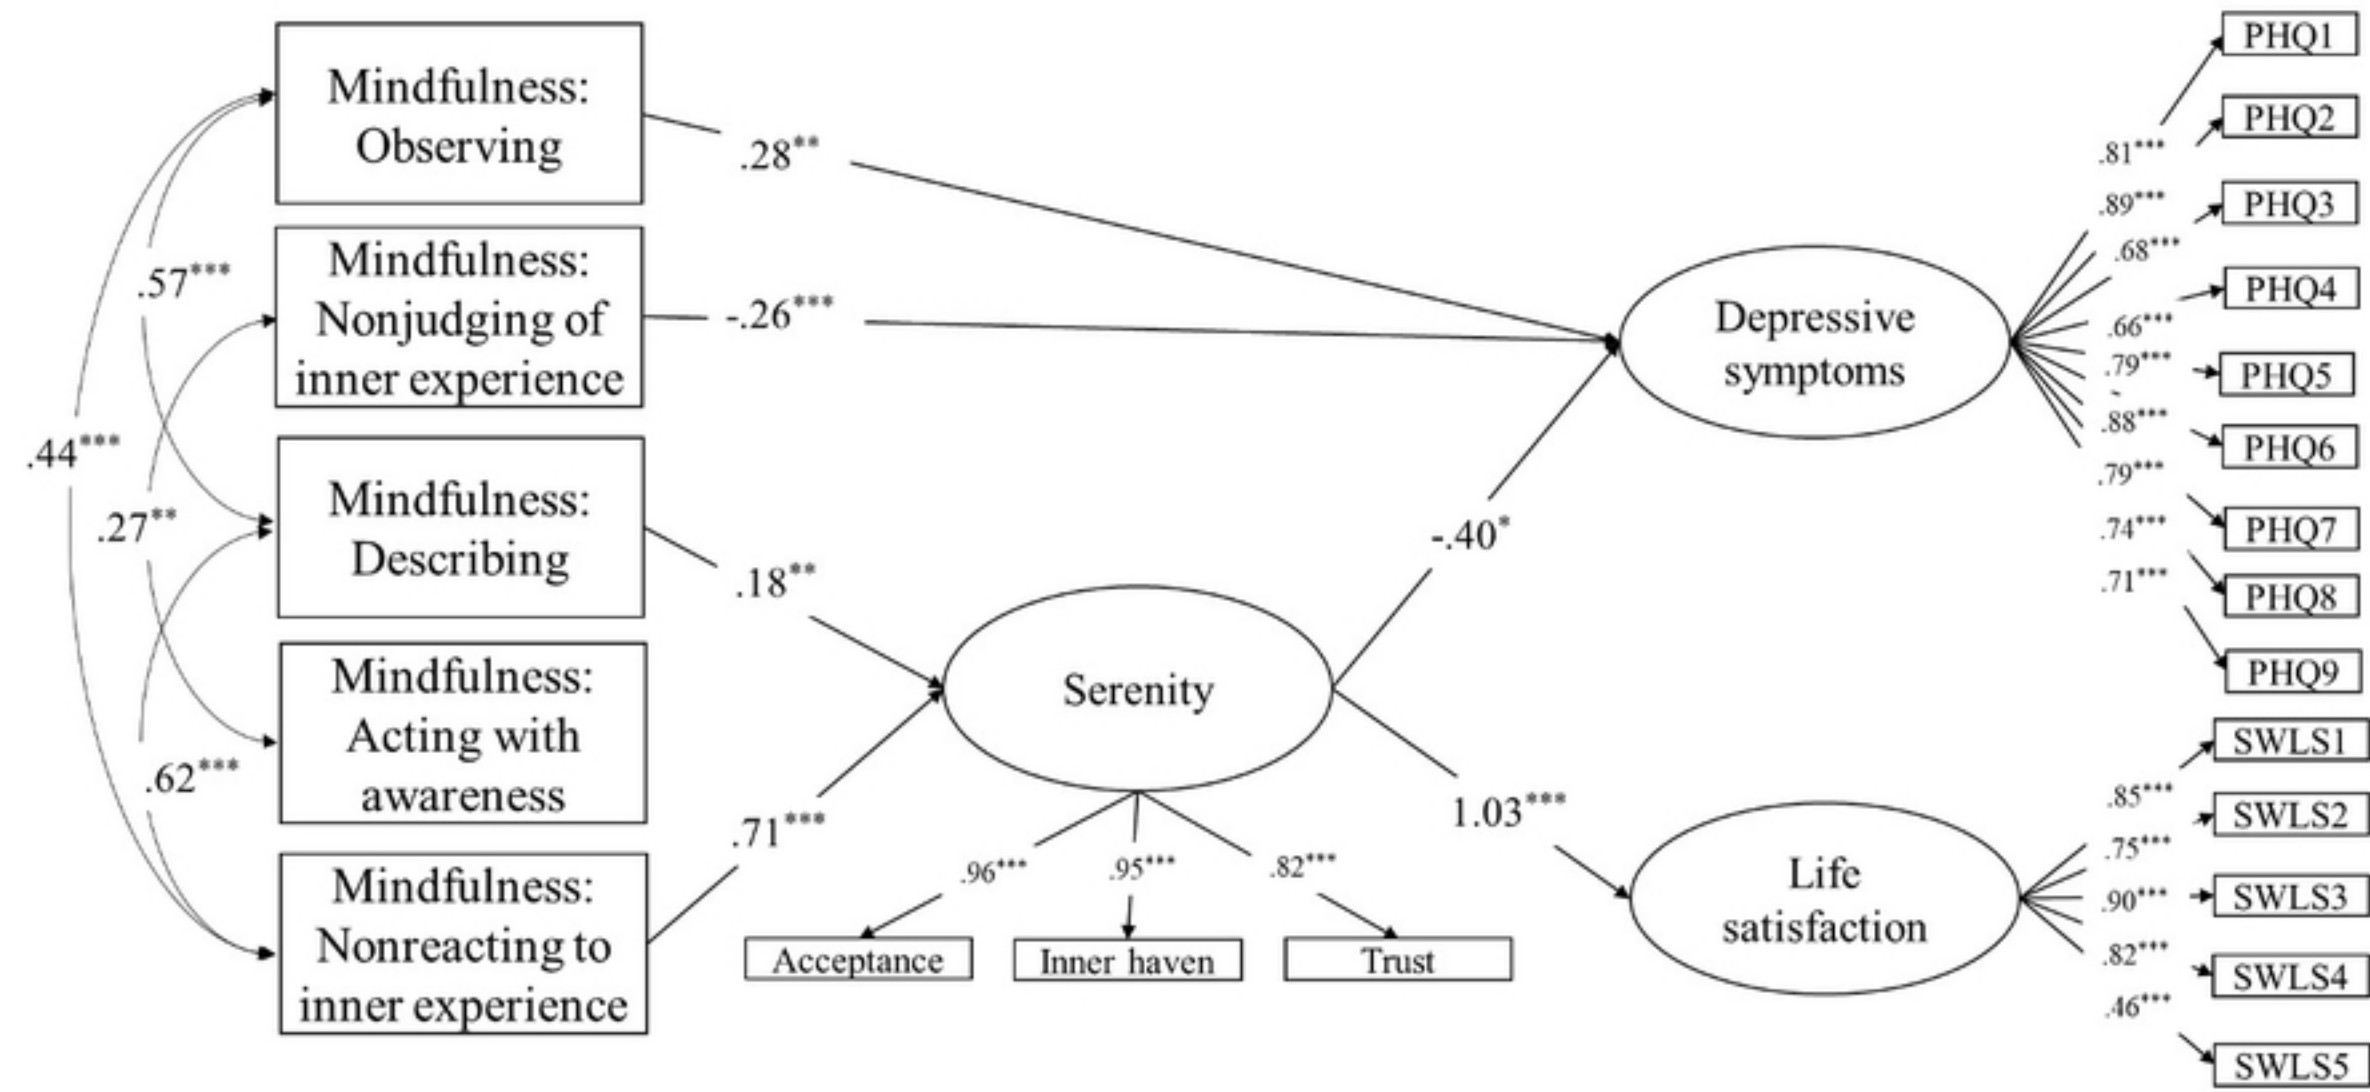

Figure
